# Supplementary material for: Fluxes and sources of nutrient and trace metal atmospheric deposition in the northwestern Mediterranean
Source: Copernicus journal article supplement (doi:10.5194/acp-18-14477-2018), 2018-10-10
Supplement: Supplementary file 3 [file acp-18-14477-2018-supplement.zip]

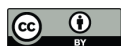

## *Supplement of*

# **Fluxes and sources of nutrient and trace metal atmospheric deposition in the northwestern Mediterranean**

**Karine Desboeufs et al.**

*Correspondence to:* Karine Desboeufs ([desboeufs@lisa.u-pec.fr](mailto:desboeufs@lisa.u-pec.fr))

- [acp-18-14477-2018-supplement-title-page.pdf](#)
- [Figure\\_tracer.pdf](#)
- [Flux\\_weekly\\_publi\\_SI.xlsx](#)
- [N\\_fluxes\\_partition.pdf](#)

The copyright of individual parts of the supplement might differ from the CC BY 4.0 License.
