# Supplementary figures and images for: Fluxes and sources of nutrient and trace metal atmospheric deposition in the northwestern Mediterranean
Source: Copernicus journal article supplement (doi:10.5194/acp-18-14477-2018), 2018-10-10

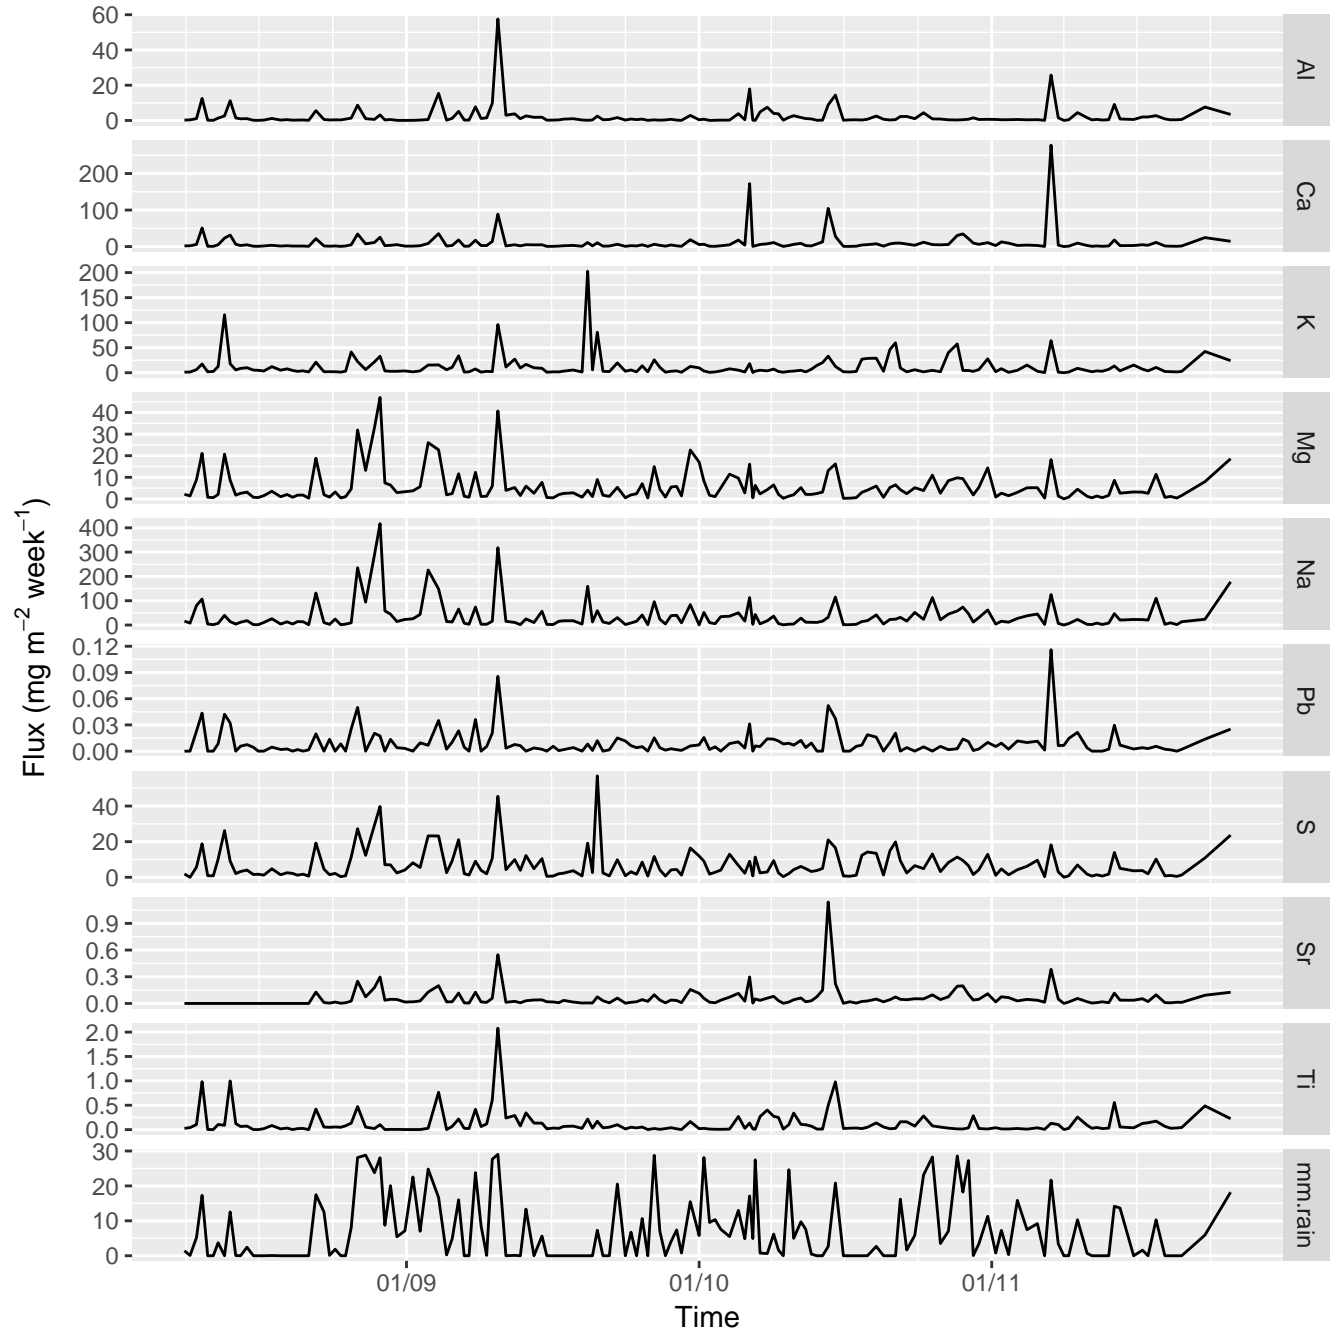

Supplement: Supplementary file 1 [file acp-18-14477-2018-supplement.zip]

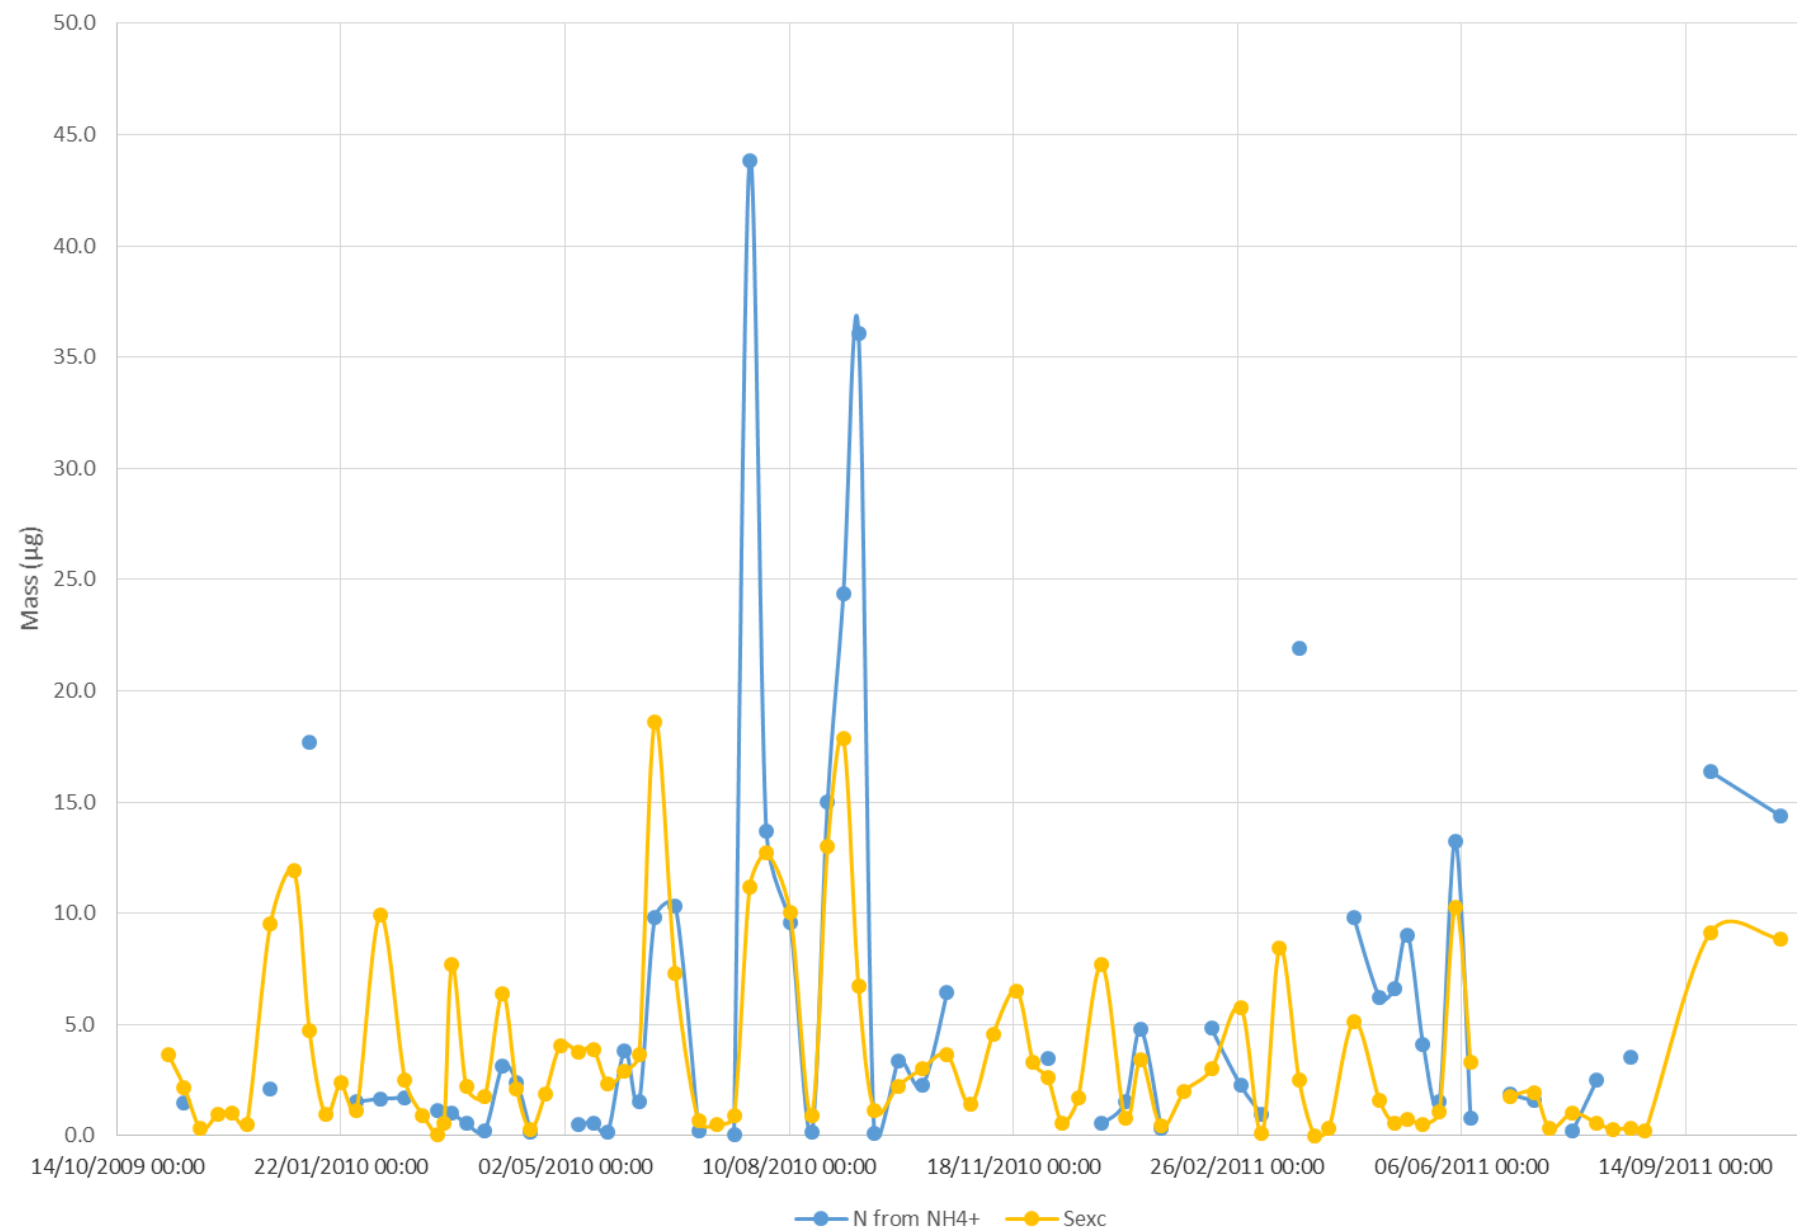

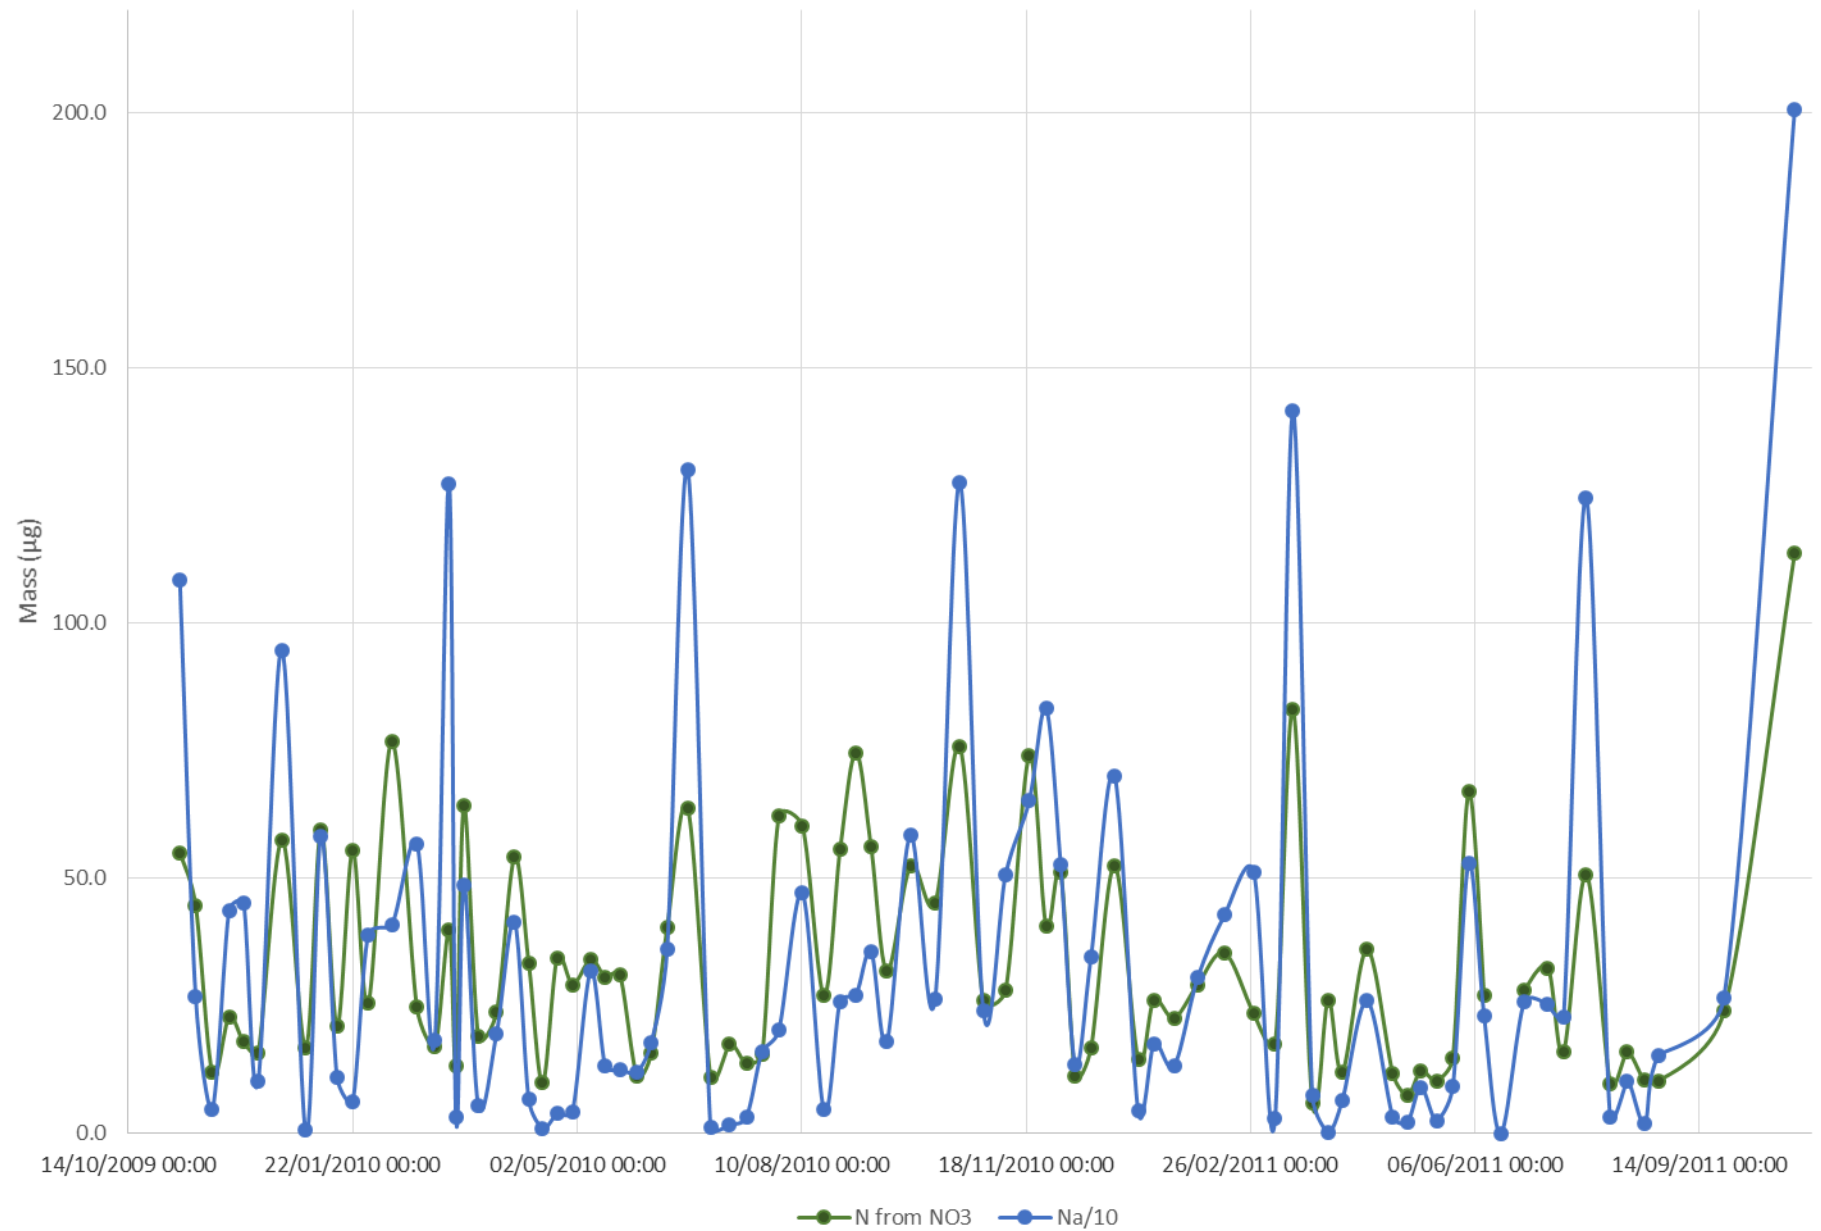

Supplement: Supplementary file 2 [file acp-18-14477-2018-supplement.zip]
